# Supplementary material for: Supramolecular synthesis and characterization of crystalline solids obtained from the reaction of 5-fluorocytosine with nitro compounds
Source: Royal Society of Chemistry journal article supplement (doi:10.1039/c9nj03329g), 2019-01-01
Supplement: c9nj03329g1.pdf [file c9nj03329g1.pdf]

## SUPPORTING INFORMATION

### Supramolecular Synthesis and Characterization of Crystalline Solids Obtained from the Reaction of 5-Fluorocytosine with Nitro Compounds

Matheus S. Souza<sup>a</sup>, Luan F. Diniz<sup>a</sup>, Natalia Alvarez<sup>b</sup>, Cecília C. P. da Silva<sup>a</sup>, Javier Ellena<sup>a\*</sup>

<sup>a</sup>Instituto de Física de São Carlos, Universidade de São Paulo, CP 369, 13.560-970, São Carlos, SP, Brazil.

<sup>b</sup>Facultad de Química, Universidad de la República, General Flores 2124, Montevideo, Uruguay.

\*e-mail address: javiere@ifsc.usp.br

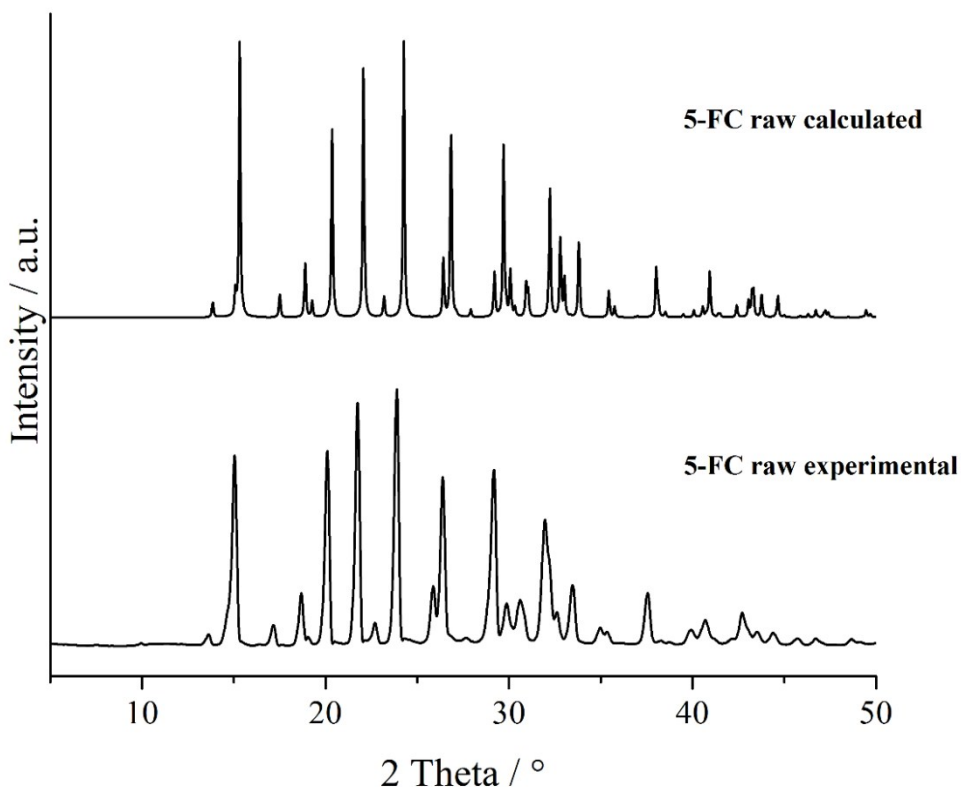

**Figure S1.** Calculated and experimental powder X-ray diffraction patterns of 5-Fluorocytosine. The diffraction patterns are in good agreement indicating that the starting material present high crystallinity and purity.

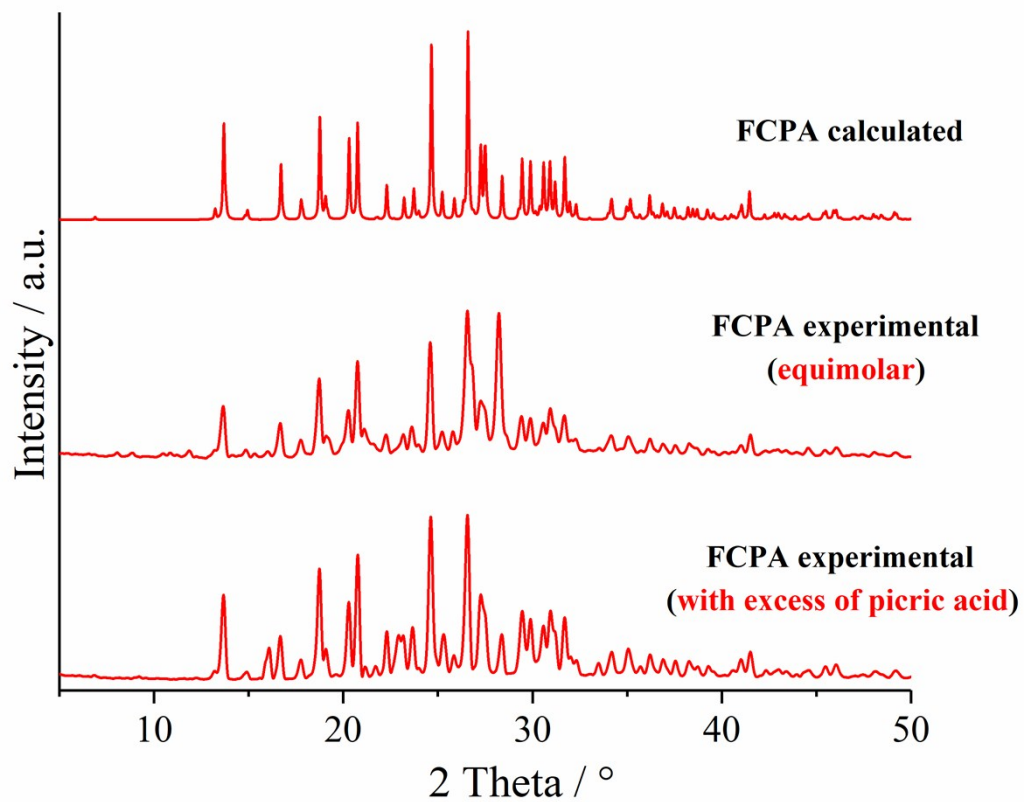

**Figure S2.** Calculated and experimental (in different stoichiometries) powder X-ray diffraction patterns of FCPA salt.

**Table S1.** Angular dimensions of protonated and neutral 5-Fluorocytosine.

| <b>Compound</b> | <b>(C2-N3-C4) internal angle / °</b> |
|-----------------|--------------------------------------|
| Neutral 5-FC    | 120.8(5)                             |
| FCPA            | 125.6(1)                             |
| 2FCPA           | 125.0(2)                             |
| FCDNS           | 124.8(1)                             |

**Table S2.** Calculated  $\Delta pK_a$  values for the reaction of 5-FC with the nitro acids studied here.

| <b>Compound</b>           | <b><math>pK_a</math></b> | <b><math>\Delta pK_a = (pK_a(5-FC) - pK_a(acid))</math></b> |
|---------------------------|--------------------------|-------------------------------------------------------------|
| 5-Fluorocytosine          | 3.26 <sup>8</sup>        | -                                                           |
| Picric acid               | 0.38 <sup>35</sup>       | 2.88                                                        |
| 3,5-dinitrosalicylic acid | 2.2 <sup>59</sup>        | 1.06                                                        |

[<sup>8, 35, 59</sup>] = References in the manuscript.
